# Supplementary material
Source: PubMed Central journal article supplement (PMC4694418)
Supplement: ijcem0008-18936-f2.pdf [file ijcem0008-18936-f2.pdf]

## MTHFR SNPs and GCA

**Table S1.** Primary information for *MTHFR* rs1801133 C>T, rs3753584 A>G, rs4845882 G>A, rs4846048 A>G and rs9651118 T>C polymorphisms

| Genotyped SNPs                                    | <i>MTHFR</i><br>rs9651118<br>T>C | <i>MTHFR</i><br>rs4846048<br>A>G | <i>MTHFR</i><br>rs1801133<br>C>T | <i>MTHFR</i><br>rs4845882<br>G>A | <i>MTHFR</i><br>rs3753584<br>A>G |
|---------------------------------------------------|----------------------------------|----------------------------------|----------------------------------|----------------------------------|----------------------------------|
| Chromosome                                        | 1                                | 1                                | 1                                | 1                                | 1                                |
| Function                                          | intron                           | intron                           | missense                         | intron                           | nearGene-5                       |
| ChrPos (Genome Build 36.3)                        | 11784801                         | 11768839                         | 11778965                         | 11765754                         | 11787173                         |
| Regulome DB Score <sup>a</sup>                    | 5                                | 3a                               | 4                                | 1f                               | 4                                |
| TFBS <sup>b</sup>                                 | Y                                | —                                | —                                | —                                | Y                                |
| Splicing (ESE or ESS)                             | —                                | —                                | —                                | —                                | Y                                |
| miRNA (miRanda)                                   | —                                | Y                                | —                                | —                                | —                                |
| nsSNP                                             | —                                | —                                | Y                                | —                                | —                                |
| MAF <sup>c</sup> for Chinese in database          | 0.382                            | 0.105                            | 0.439                            | 0.198                            | 0.093                            |
| MAF in our controls (n = 608)                     | 0.353                            | 0.102                            | 0.444                            | 0.175                            | 0.067                            |
| P value for HWE <sup>d</sup> test in our controls | 0.456                            | 0.097                            | 0.033                            | 0.066                            | 0.764                            |
| Genotyping method <sup>e</sup>                    | LDR                              | LDR                              | LDR                              | LDR                              | LDR                              |
| % Genotyping value                                | 96.59%                           | 98.19%                           | 97.65%                           | 98.93%                           | 97.65%                           |

<sup>a</sup><http://www.regulomedb.org/>; <sup>b</sup>TFBS: Transcription Factor Binding Site (<http://snpinfo.niehs.nih.gov/snpinfo/snfunc.htm>);

<sup>c</sup>MAF: minor allele frequency; <sup>d</sup>HWE: Hardy-Weinberg equilibrium; <sup>e</sup>LDR: ligation detection reaction.
